# Supplementary material
Source: PubMed Central journal article supplement (PMC555970)
Supplement: pnas_102_14_5108__1.pdf [file pnas_102_14_5108__1.pdf]

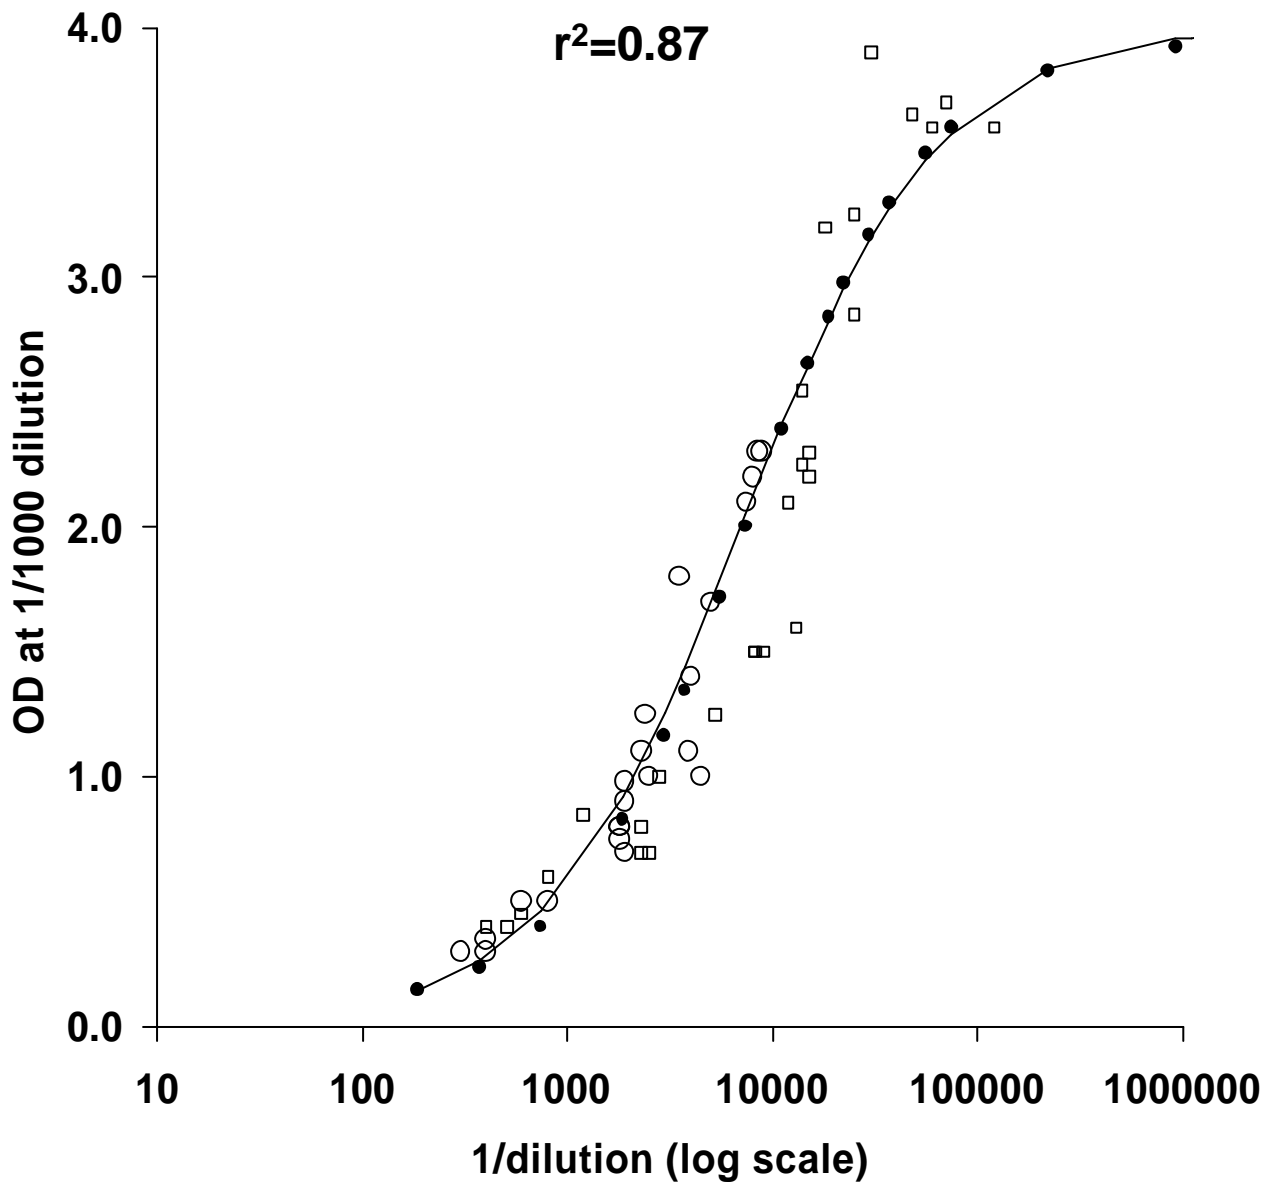

- Anti-MSP-2 IgG3
- Anti-AMA-1 IgG1
- Theoretical curve for single antibody and antigen
- Least squares fit to logit-transformed data
